# Supplementary material for: A combination of Al-doped ZnO and a conjugated polyelectrolyte interlayer for small molecule solution-processed solar cells with an inverted structure
Source: Royal Society of Chemistry journal article supplement (doi:10.1039/c3ta12162c), 2013-01-01
Supplement: c3ta12162c.pdf [file c3ta12162c.pdf]

## Supporting Information

### Combination of Al-Doped ZnO and a Conjugated Polyelectrolyte interlayers for small molecule solution-processed solar cells with inverted structure

Jie Min\*<sup>1</sup>, Hong Zhang<sup>1</sup>, Tobias Stubhan<sup>1</sup>, Yuriy N. Luponosov<sup>3</sup>, Mario Kraft<sup>5</sup>, Sergei A. Ponomarenko<sup>3,4</sup>, TayebbehAmeri<sup>1</sup>, Ullrich Scherf<sup>5</sup>, and Christoph J. Brabec<sup>1,2</sup>

<sup>1</sup>Institute of Materials for Electronics and Energy Technology (I-MEET), Friedrich-Alexander-University Erlangen-Nuremberg, Martensstraße 7, 91058 Erlangen, Germany

<sup>2</sup>Bavarian Center for Applied Energy Research (ZAE Bayern), Haberstraße 2a, 91058 Erlangen, Germany

<sup>3</sup>Enikolopov Institute of Synthetic Polymeric Materials of the Russian Academy of Sciences, Profsoyuznaya St. 70, Moscow 117393, Russia

<sup>4</sup>Chemistry Department, Moscow State University, Leninskie Gory 1-3, Moscow 119991, Russia

<sup>5</sup>Macromolecular Chemistry Group (buwmakro) and Institute for Polymer Technology (IfP), Bergische Universität Wuppertal, Gaußstraße 20, 42097 Wuppertal, Germany

E-mail: [Min.Jie@ww.uni-erlangen.de](mailto:Min.Jie@ww.uni-erlangen.de) (J. Min)

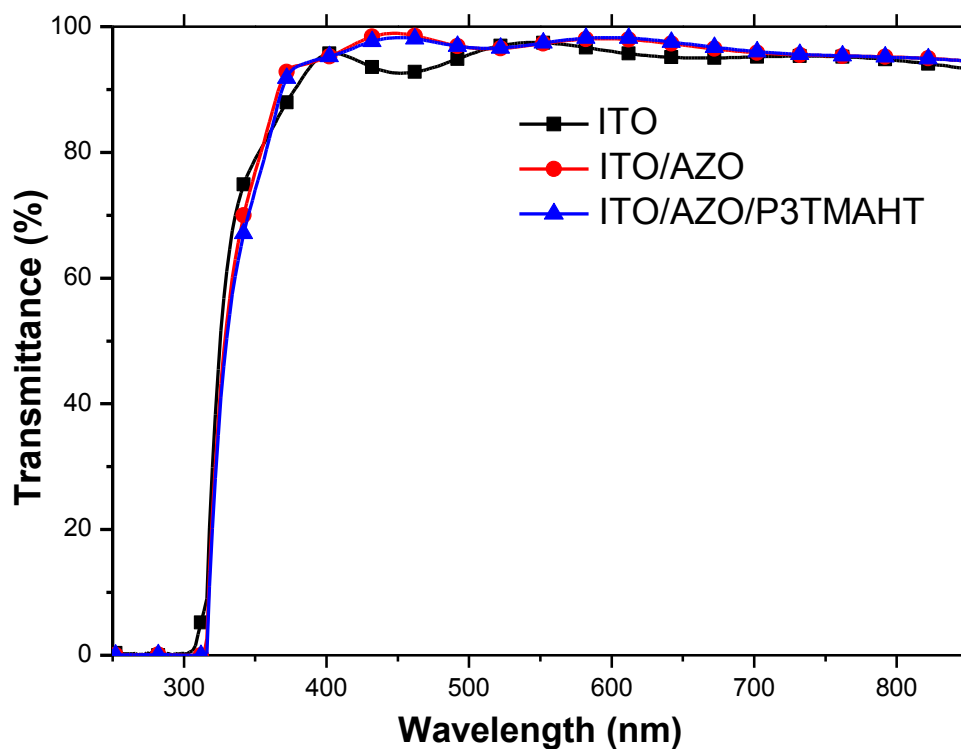

Figure S1. Optical transmittance spectra of the AZO and AZO/P3TMAHT layers on ITO-substrates. (Due to the slight difference between the thickness of the ITO-substrates, the ITO has less transmittance than ITO/AZO and ITO/AZO/P3TMAHT)

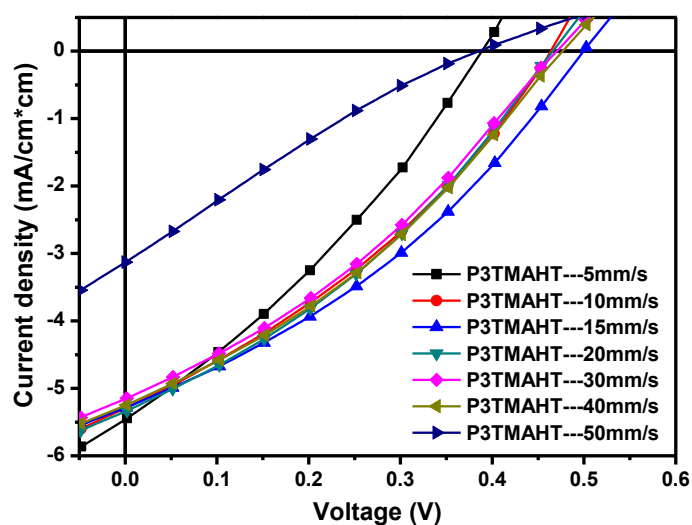

Figure S2.  $J$ - $V$  characteristics of conventional device (ITO/P3TMAHT /BHJ/Ca/Ag) using different speeds (doctor-blade) for P3TMAHT layer.

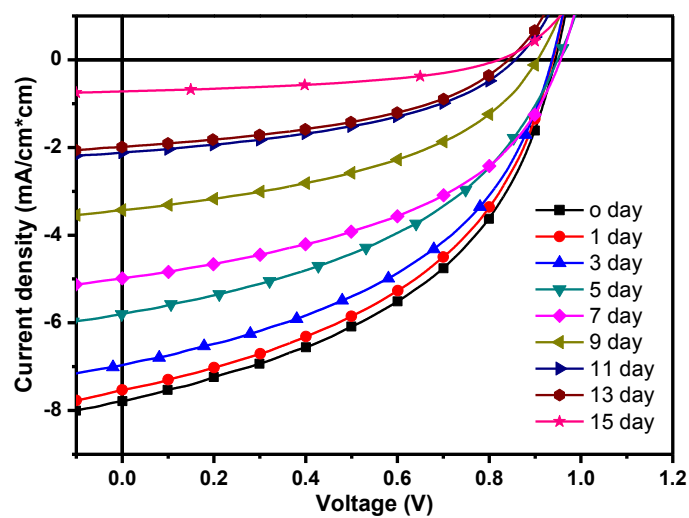

Figure S3.  $J$ - $V$  characteristics of conventional device (ITO/PEDOT/BHJ/Ca/Ag) without encapsulation in air.

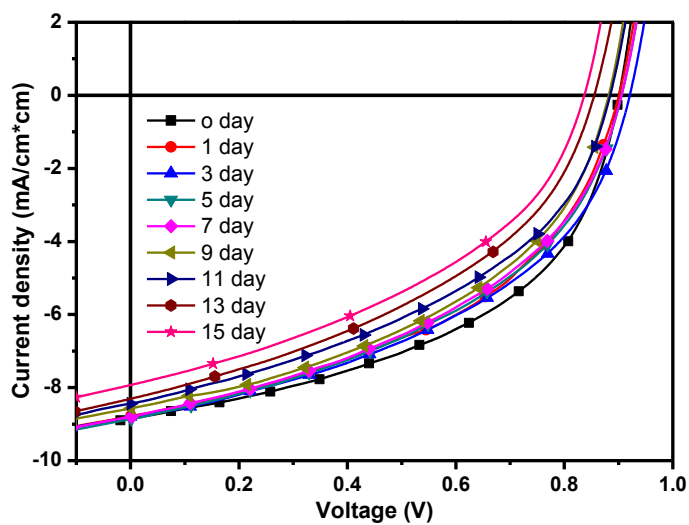

Figure S4.  $J$ - $V$  characteristics of inverted device (ITO/AZO/P3TMAHT/BHJ/MoO<sub>3</sub>/Ag) without encapsulation in air.
